# Supplementary material for: Production, Characterization, and Assessment of Permanently Cationic and Ionizable Lipid Nanoparticles for Use in the Delivery of Self-Amplifying RNA Vaccines
Source: MDPI journal article supplement (doi:10.3390/pharmaceutics15041173), 2023-04-07
Supplement: s1 [file s1]

## SUPPLEMENTARY INFORMATION

### **Production, characterization, and assessment of permanently cationic and ionizable Lipid Nanoparticles for use in the delivery of self-amplifying RNA vaccines**

Dylan Kairuz<sup>1</sup>, Nazia Samudh<sup>1</sup>, Abdullah Ely<sup>1</sup>, Patrick Arbuthnot<sup>1</sup>, Kristie Bloom<sup>1\*</sup>

1 Wits/SAMRC Antiviral Gene Therapy Research Unit, Faculty of Health Sciences, Infectious Diseases and Oncology Research Institute (IDORI), University of the Witwatersrand, Johannesburg, South Africa

\* Correspondence: Kristie.Bloom@wits.ac.za; Tel.: +27 (0)11 717 1206

#### **Supplementary Methods**

##### Gel retardation assay:

To assess RNA complexation efficacy of saRNA-Ext-LNPs, a gel retardation assay was performed. saRNA-Ext-cLNPs were produced and formulated with saRNA-eGFP at different N:P ratios. Samples were mixed with 2× RNA Loading Dye (New England Biolabs, Massachusetts, USA) containing ethidium bromide. These were run on a 1% denaturing formaldehyde agarose gel and imaged thereafter. Naked saRNA-eGFP was used as a negative control to identify uncomplexed or free saRNA in saRNA-Ext-cLNP samples.

## Supplementary Figures

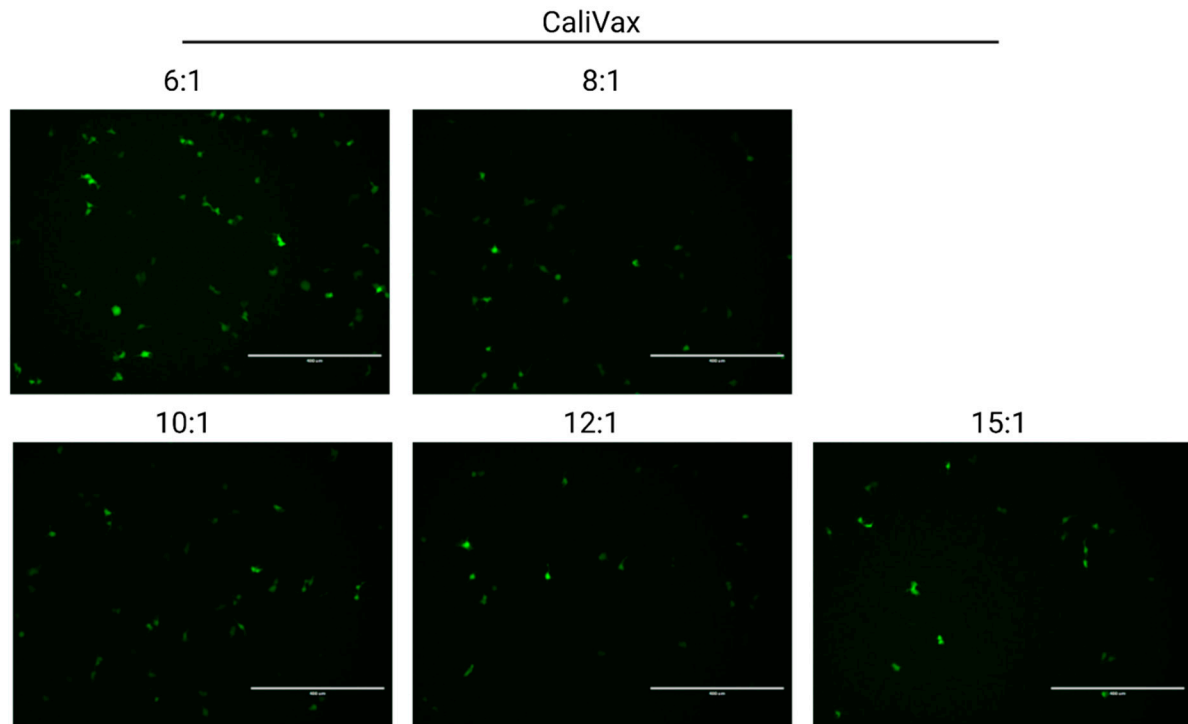

**Figure S1. saRNA-Ext-CaliVax optimization.** Various N:P ratios were tested to determine the optimal ratio for transfection of saRNA. Other than the optimal N:P ratio shown in Figure 4a, higher N:P ratios were found to be less efficient at delivering saRNA. This included 8:1, 10:1, 12:1 and 15:1 N:P ratios. Images were taken at 24 hours post-transfection. Created with BioRender.com

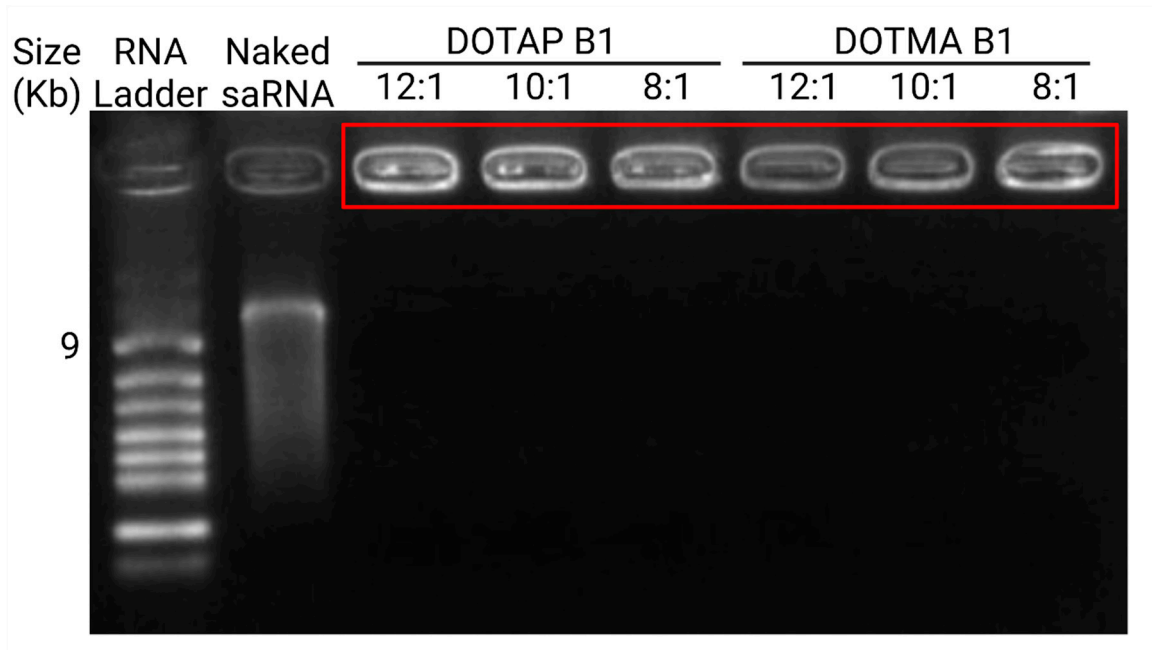

**Figure S2.** Gel retardation assay of DOTAP and DOTMA B1 saRNA-Ext-cLNPs. Retardation of the sample in the saRNA-LNP sample wells (outlined in red) is evident as compared to the naked saRNA control, where a distinct band can be visualized just above 9 kb. This shows efficient saRNA complexation to the exterior of the LNPs preventing free RNA migrating through the agarose gel. Created with BioRender.com

## Supplementary Tables

**Table S1** - Primers used for qRT-PCR of transcripts encoding innate immune response proteins

| Gene                          | Amplicon size | Primer Name     | Primer Sequence (5'-3')           |
|-------------------------------|---------------|-----------------|-----------------------------------|
| <i>OAS1</i>                   | 84            | OAS1-F          | CGA GGG AGC ATG AAA ACA CAT TT    |
|                               |               | OAS1-R          | GCA GAG TTG CTG GTA GTT TAT GAC   |
| <i>PKR</i>                    | 171           | PKR-F           | GAAGTGGACCTCTACGCTTTGG            |
|                               |               | PKR-R           | TGATGCCATCCCGTAGGTCTGT            |
| <i>IFN-<math>\beta</math></i> | 110           | IFN- $\beta$ -F | TCC AAA TTG CTC TCC TGT TGT GCT   |
|                               |               | IFN- $\beta$ -R | CCA CAG GAG CTT CTG ACA CTG AAA A |
| <i>IFIT1</i>                  | 182           | IFIT-F          | CCC TGA AGC TTC AGG ATG AAG G     |
|                               |               | IFIT-R          | AGA AGT GGG TGT TTC CTG CAA G     |
| <i>GAPDH</i>                  | 226           | GAPDH-F         | GAA GGT GAA GGT CGG AGT C         |
|                               |               | GAPDH-R         | GAA GAT GGT GAT GGG ATT TC        |

**Table S2** - Delta Ct, fold change and statistics for qRT-PCR.

| Mock | 1000 g     |      | 500 µg     |      | 250 µg     |      |
|------|------------|------|------------|------|------------|------|
|      | ΔCt (Mean) | SEM  | ΔCt (Mean) | SEM  | ΔCt (Mean) | SEM  |
| IFNβ | 18.34      | 0.33 | 16.00      | 0.11 | 16.20      | 0.22 |
| IFIT | 9.57       | 0.16 | 9.43       | 0.03 | 9.22       | 0.10 |
| OAS  | 22.04      | 0.28 | 23.42      | 0.27 | 22.43      | 0.22 |
| PKR  | 7.23       | 0.29 | 7.24       | 0.07 | 7.37       | 0.11 |

| CCAU-saRNA-Luc2 | 1000 g     |      |             |         | 500 µg     |      |             |         | 250 µg     |      |             |         |
|-----------------|------------|------|-------------|---------|------------|------|-------------|---------|------------|------|-------------|---------|
|                 | ΔCt (Mean) | SEM  | Fold change | P-value | ΔCt (Mean) | SEM  | Fold change | P-value | ΔCt (Mean) | SEM  | Fold change | P-value |
| IFNβ            | 15.84      | 0.23 | 5.52        | 0.0048  | 17.26      | 0.27 | 0.43        | 0.0297  | 16.14      | 0.08 | 1.03        | 0.8072  |
| IFIT            | 8.28       | 0.29 | 2.50        | 0.0296  | 9.24       | 0.21 | 1.17        | 0.4634  | 9.12       | 0.10 | 1.06        | 0.5692  |
| OAS             | 18.35      | 0.51 | 13.81       | 0.0069  | 20.89      | 0.32 | 5.83        | 0.0040  | 21.50      | 0.14 | 1.88        | 0.0323  |
| PKR             | 7.05       | 0.24 | 1.12        | 0.6601  | 7.20       | 0.19 | 1.04        | 0.8639  | 7.20       | 0.11 | 1.12        | 0.3507  |

| Poly I:C | 1000 g     |      |             |         | 500 µg     |      |             |         | 250 µg     |      |             |         |
|----------|------------|------|-------------|---------|------------|------|-------------|---------|------------|------|-------------|---------|
|          | ΔCt (Mean) | SEM  | Fold change | P-value | ΔCt (Mean) | SEM  | Fold change | P-value | ΔCt (Mean) | SEM  | Fold change | P-value |
| IFNβ     | 12.69      | 0.39 | 51.44       | 0.0004  | 15.42      | 0.18 | 1.50        | 0.0655  | 16.44      | 0.08 | 0.83        | 0.3946  |
| IFIT     | 4.66       | 0.35 | 31.46       | 0.0015  | 7.69       | 0.21 | 3.41        | 0.0128  | 9.05       | 0.08 | 1.12        | 0.2748  |
| OAS      | 12.81      | 0.49 | 647.60      | 0.0004  | 15.75      | 0.35 | 208.63      | 0.00009 | 21.71      | 0.37 | 1.72        | 0.1907  |
| PKR      | 6.63       | 0.18 | 1.48        | 0.1702  | 6.84       | 0.18 | 1.33        | 0.1468  | 7.05       | 0.06 | 1.24        | 0.0865  |

Note: Significant increases in mRNA expression are highlighted in orange.

**Table S3** - Lipid compositions of formulated cLNPs

| Formulation Code | Lipid composition        | Lipid Molar Ratio |
|------------------|--------------------------|-------------------|
| B1               | Cationic Lipid:Chol:DOPE | 35:49:16          |
| F1               | Cationic Lipid:Chol:DOPE | 50:40:10          |
| F2               | Cationic Lipid:Chol:DSPC | 50:40:10          |
| G1               | Cationic Lipid:Chol:DOPE | 45:25:30          |
| I1               | Cationic Lipid:DOPE      | 50:50             |

**Table S4** - saRNA-cLNP average sizes and PDIs as measured by dynamic light scattering

| Type of saRNA Formulation (Ext/Int) | Formulation Code | N:P Ratio | Average Size (nm) | PDI             |
|-------------------------------------|------------------|-----------|-------------------|-----------------|
| External                            | CaliVax          | 2.5:1     | 347.5 ± 17.3      | 0.42370 ± 0.040 |
|                                     | DOTAP F1         | 8:1       | 211.2 ± 4.84      | 0.3101 ± 0.037  |
|                                     | DOTMA F1         | 12:1      | 162.2 ± 1.5       | 0.1946 ± 0.019  |
|                                     | DOTAP G1         | 8:1       | 167.8 ± 1.525     | 0.1162 ± 0.025  |
|                                     | DOTMA G1         | 8:1       | 174.30 ± 1.72     | 0.08463 ± 0.013 |
|                                     | DDA B1           | 8:1       | 294.1 ± 4.97      | 0.3631 ± 0.025  |
|                                     | DOTAP B1         | 8:1       | 167.3 ± 1.15      | 0.1679 ± 0.033  |
|                                     | DOTMA B1         | 12:1      | 174 ± 1.19        | 0.1408 ± 0.0052 |
|                                     | DOTAP F2         | 4:1       | 574.6 ± 1.41      | 0.371 ± 0.05    |
|                                     | DOTMA F2         | 4:1       | 235.9 ± 22.64     | 0.41 ± 0.026    |
|                                     | DOTMA I1         | 8:1       | 185.3 ± 0.4474    | 0.1745 ± 0.028  |
|                                     | DOTAP I1         | 8:1       | 171.8 ± 2.443     | 0.2079 ± 0.032  |
| Internal                            | DOTAP F1         | 15:1      | 160.8 ± 1.51      | 0.3025 ± 0.021  |
|                                     | DOTAP F1         | 12:1      | 187.4 ± 3.51      | 0.3691 ± 0.009  |
|                                     | DOTAP F1         | 8:1       | 220.5 ± 8.49      | 0.436 ± 0.0798  |
|                                     | DDA F2           | 12:1      | 377.3 ± 6.912     | 0.4349 ± 0.029  |
|                                     | DOTMA F1         | 12:1      | 287.8 ± 5.177     | 0.4527 ± 0.005  |
|                                     | DOTAP B1         | 12:1      | 166.4 ± 0.1455    | 0.2555 ± 0.03   |
|                                     | DOTAP B1         | 8:1       | 151.2 ± 1.62      | 0.2597 ± 0.0058 |
|                                     | DOTMA B1         | 12:1      | 204.3 ± 3.39      | 0.293 ± 0.028   |
